# Supplementary material for: Self-assembly of thiolato-bridged ester-functionalized Re(i)-based tetranuclear spiro-metallacyclophanes
Source: Royal Society of Chemistry journal article supplement (doi:10.1039/d2nj04784e), 2023-01-01
Supplement: d2nj04784e1.pdf [file d2nj04784e1.pdf]

**Self-Assembly of thiolato-bridged ester functionalized Re(I)-based  
tetranuclear spiro-metallacyclophanes**

Jisna Varghese, Udit Kumar, Shilpa Jose, Aamir Afzal Magray, S. Yeswanth Kumar, R.  
Padmanaban, Bala. Manimaran\*

*Department of Chemistry, Pondicherry University, Puducherry, 605014, India*

\* Corresponding author. Tel.: +91 413 2654414; fax: +91 413 2656740

E-mail: manimaran.che@pondiuni.edu.in (Bala. Manimaran)

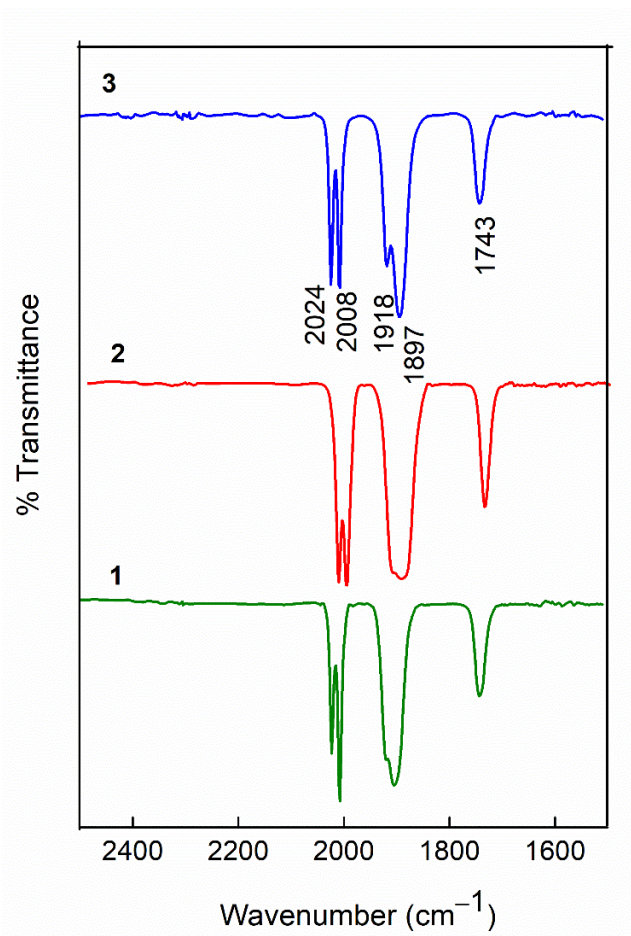

**Fig. S1** Stacked IR spectra of tetranuclear spiro-metallacyclophanes **1–3** in  $\text{CH}_2\text{Cl}_2$ .

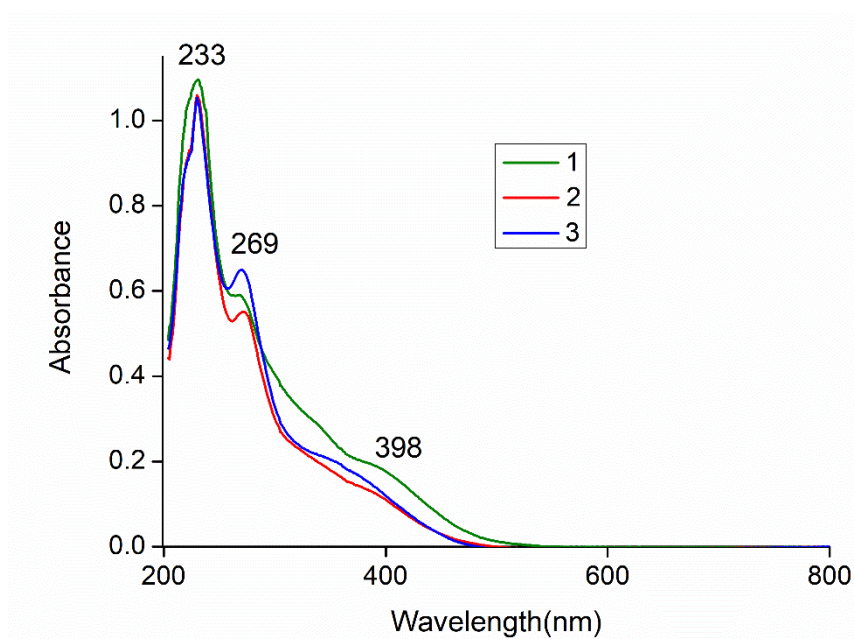

**Fig. S2** Overlay UV-vis absorption spectra of tetranuclear spiro-metallacyclophanes **1–3** in  $\text{CH}_2\text{Cl}_2$ .

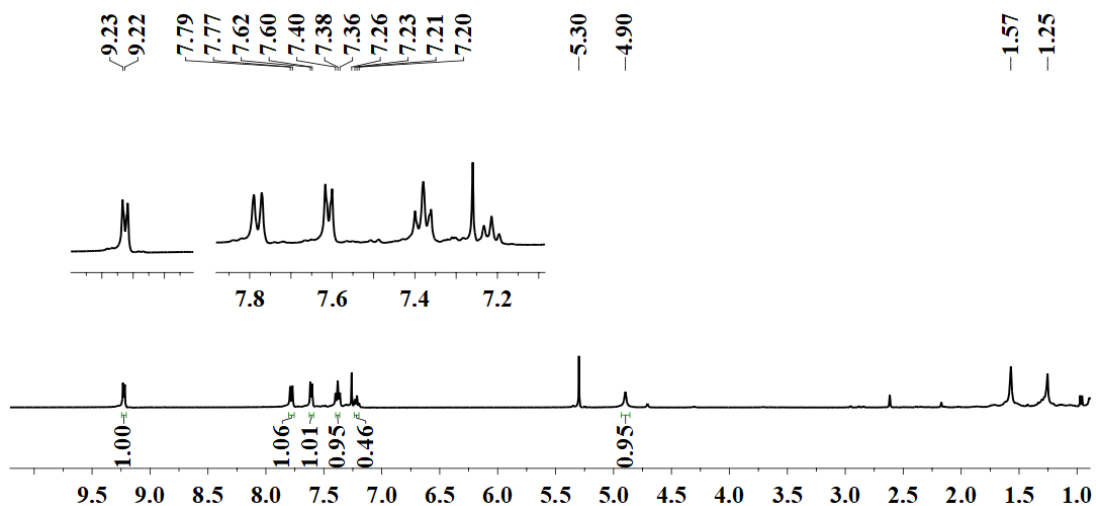

**Fig. S3**  $^1\text{H}$  NMR spectrum of  $[\{(\text{CO})_3\text{Re}(\mu\text{-SC}_6\text{H}_5)_2\text{Re}(\text{CO})_3\}_2(\mu\text{-}\eta^4\text{-ptpc})]$  (**1**) in  $\text{CDCl}_3$ .

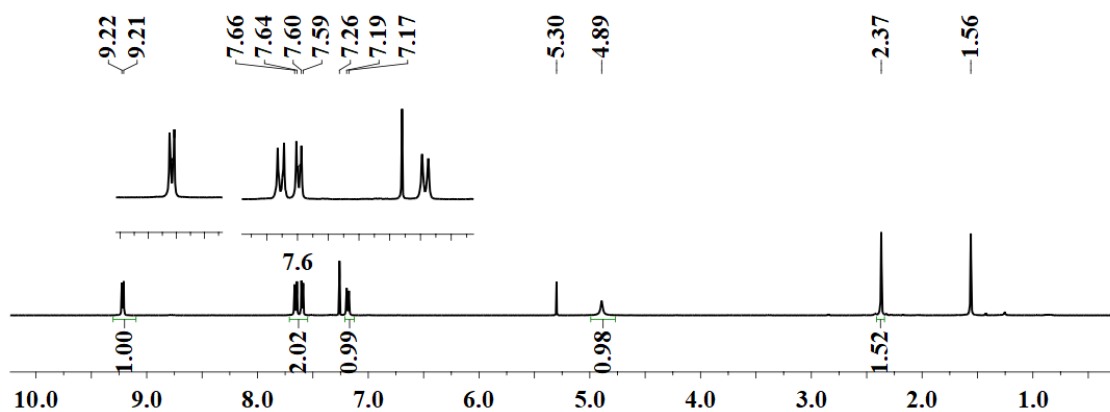

**Fig. S4**  $^1\text{H}$  NMR spectrum of  $[\{(\text{CO})_3\text{Re}(\mu\text{-SC}_6\text{H}_4\text{CH}_3)_2\text{Re}(\text{CO})_3\}_2(\mu\text{-}\eta^4\text{-ptpc})]$  (**2**) in  $\text{CDCl}_3$ .

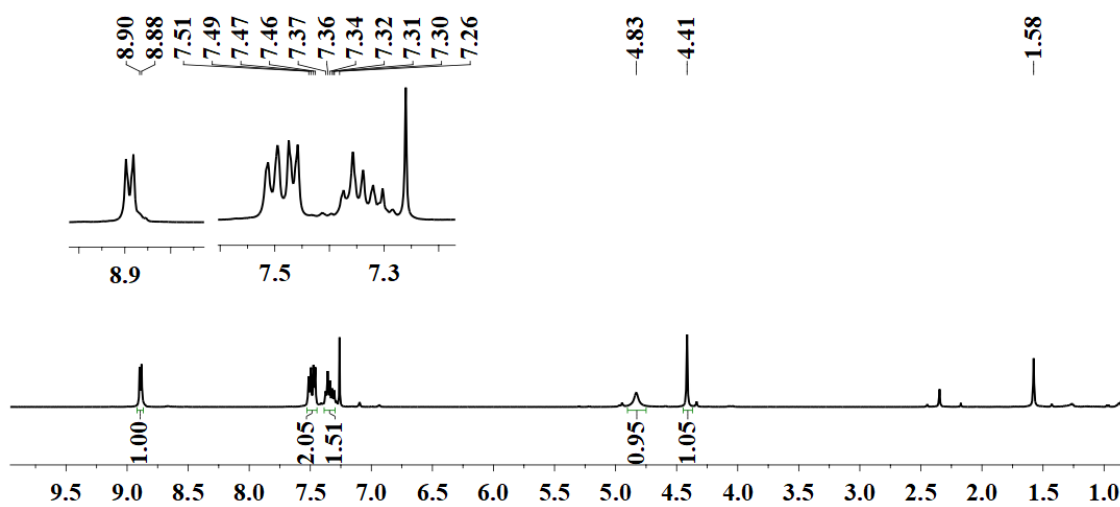

**Fig. S5**  $^1\text{H}$  NMR spectrum of  $[\{(\text{CO})_3\text{Re}(\mu\text{-SCH}_2\text{C}_6\text{H}_5)_2\text{Re}(\text{CO})_3\}_2(\mu\text{-}\eta^4\text{-ptpc})]$  (**3**) in  $\text{CDCl}_3$ .

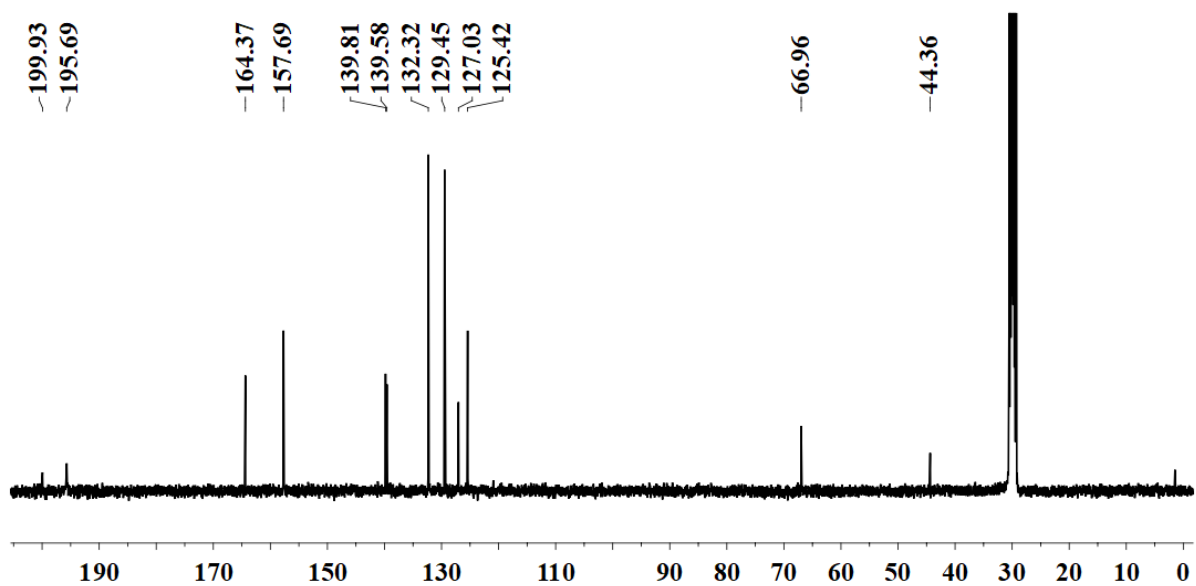

**Fig. S6**  $^{13}\text{C}$  NMR spectrum of  $[\{(\text{CO})_3\text{Re}(\mu\text{-SC}_6\text{H}_5)_2\text{Re}(\text{CO})_3\}_2(\mu\text{-}\eta^4\text{-ptpc})]$  (**1**) in  $\text{C}_3\text{D}_6\text{O}$ .

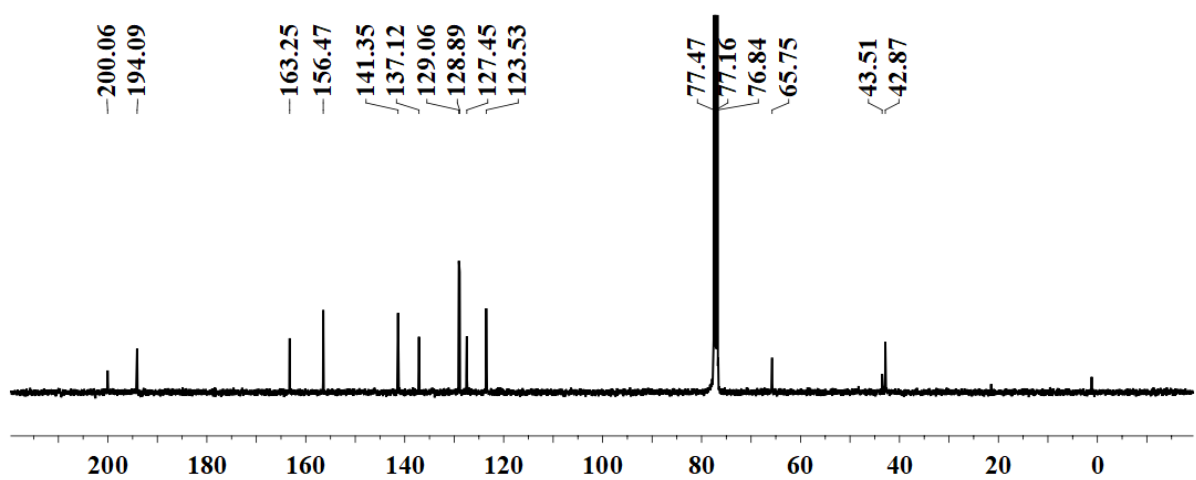

**Fig. S7**  $^{13}\text{C}$  NMR spectrum of  $[\{(\text{CO})_3\text{Re}(\mu\text{-SCH}_2\text{C}_6\text{H}_5)_2\text{Re}(\text{CO})_3\}_2(\mu\text{-}\eta^4\text{-ptpc})]$  (**3**) in  $\text{CDCl}_3$ .

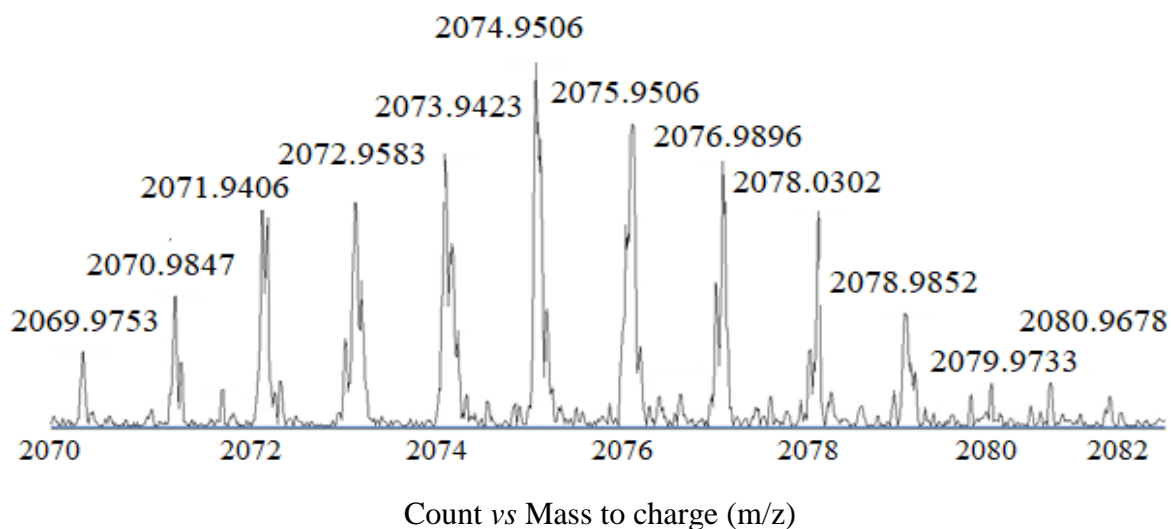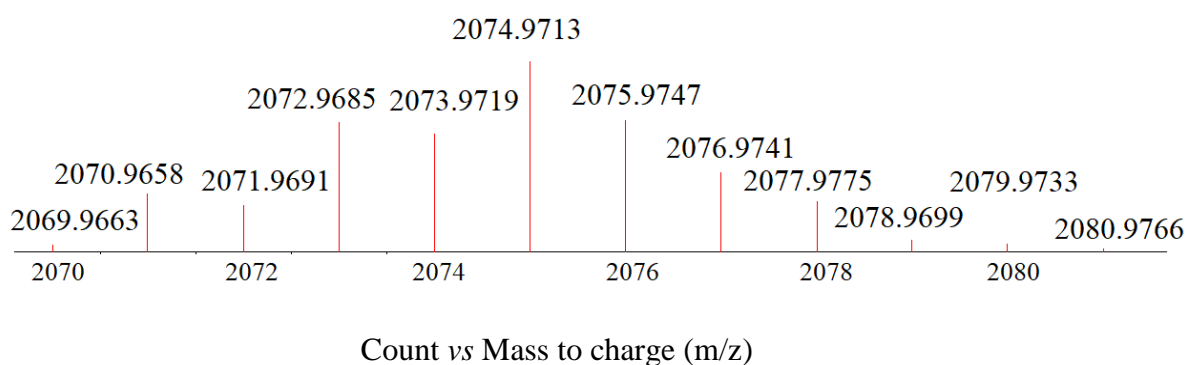

**Fig. S8** Experimental (top) and theoretical (bottom) isotopic distribution patterns of ESI-mass spectrum of  $[(\text{CO})_3\text{Re}(\mu\text{-SC}_6\text{H}_5)_2\text{Re}(\text{CO})_3]_2(\mu\text{-}\eta^4\text{-ptpc})$  (**1**)  $[\text{M}]^+$ .

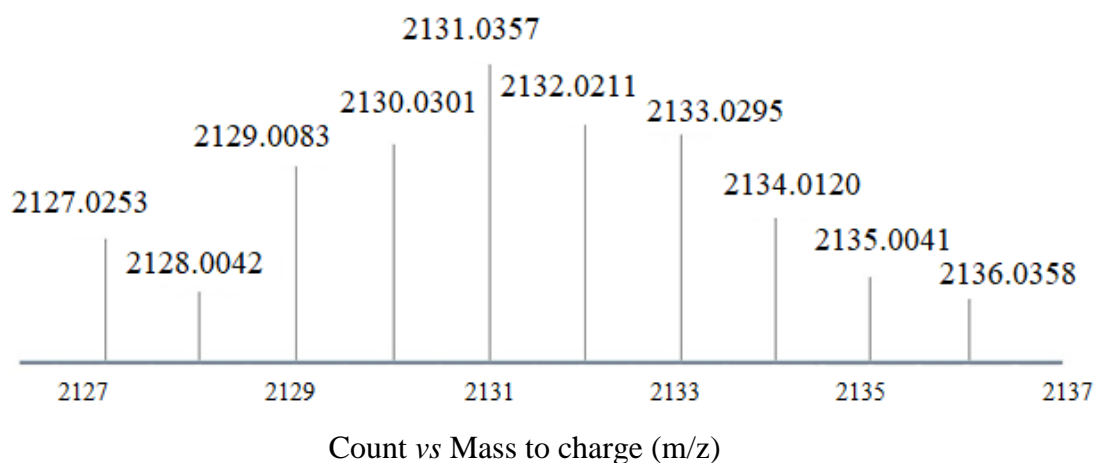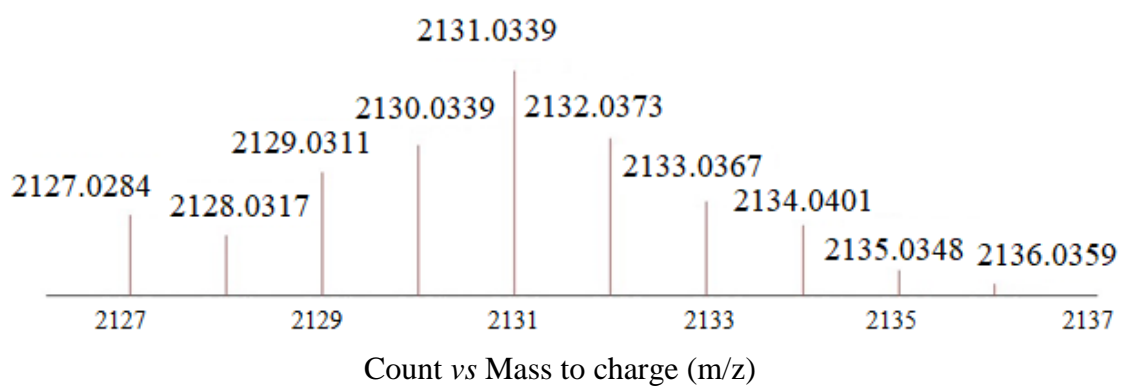

**Fig. S9** Experimental (top) and theoretical (bottom) isotopic distribution patterns of ESI-mass spectrum of  $[\{(\text{CO})_3\text{Re}(\mu\text{-SC}_6\text{H}_4\text{CH}_3)_2\text{Re}(\text{CO})_3\}_2(\mu\text{-}\eta^4\text{-ptpc})] (\mathbf{2}) [\text{M}+\text{H}]^+$ .

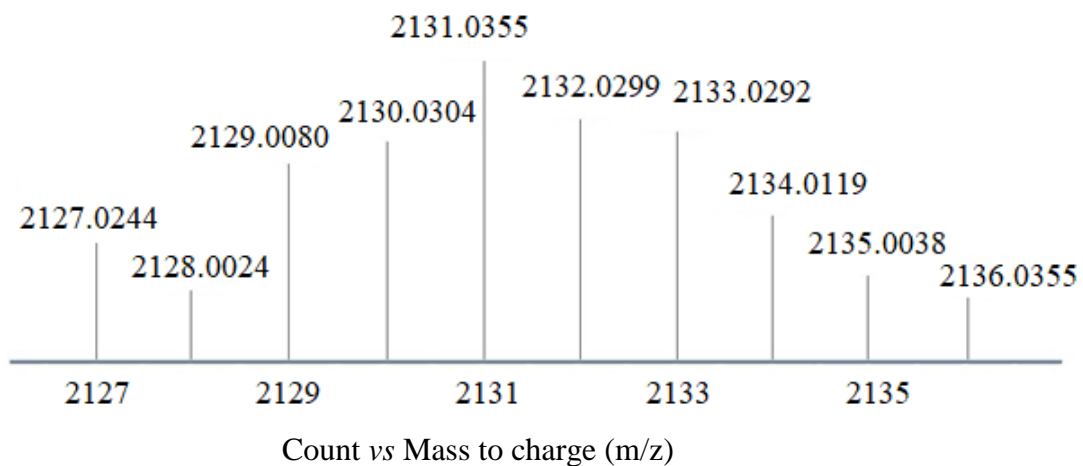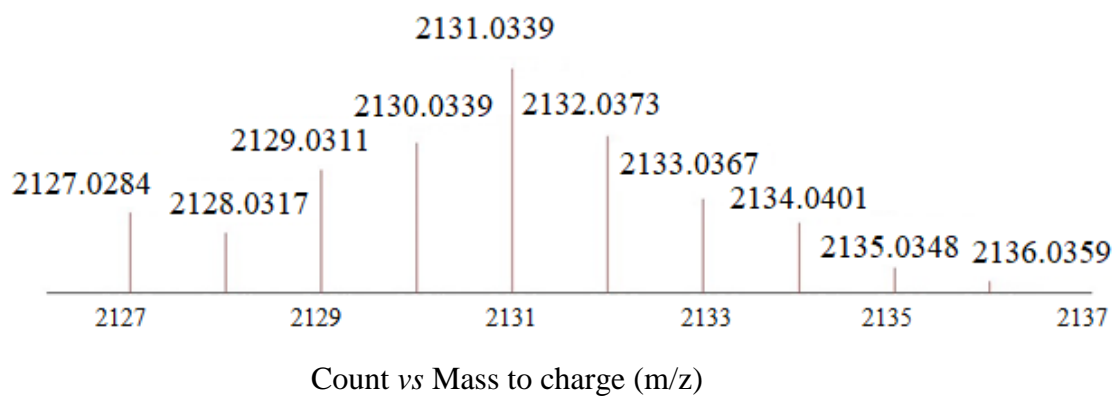

**Fig. S10** Experimental (top) and theoretical (bottom) isotopic distribution patterns of ESI-mass spectrum of  $[\{(\text{CO})_3\text{Re}(\mu\text{-SCH}_2\text{C}_6\text{H}_5)_2\text{Re}(\text{CO})_3\}_2(\mu\text{-}\eta^4\text{-ptpc})] (\mathbf{3}) [\text{M}+\text{H}]^+$ .

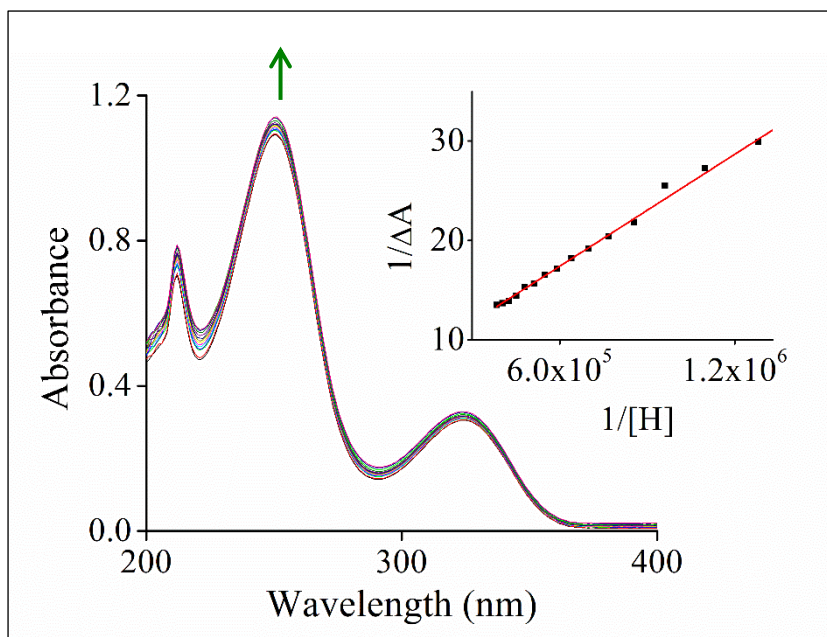

**Fig. S11** Electronic absorption spectra of *p*-phenylenediamine ( $1.3 \times 10^{-4}$  M) increasing upon incremental addition of host **2** ( $2.0$ – $24.0 \times 10^{-7}$  M) in tetrahydrofuran and inset shows the corresponding Benesi-Hildebrand plot. Regression analysis was carried out at  $\lambda_{\max}$  249 nm.

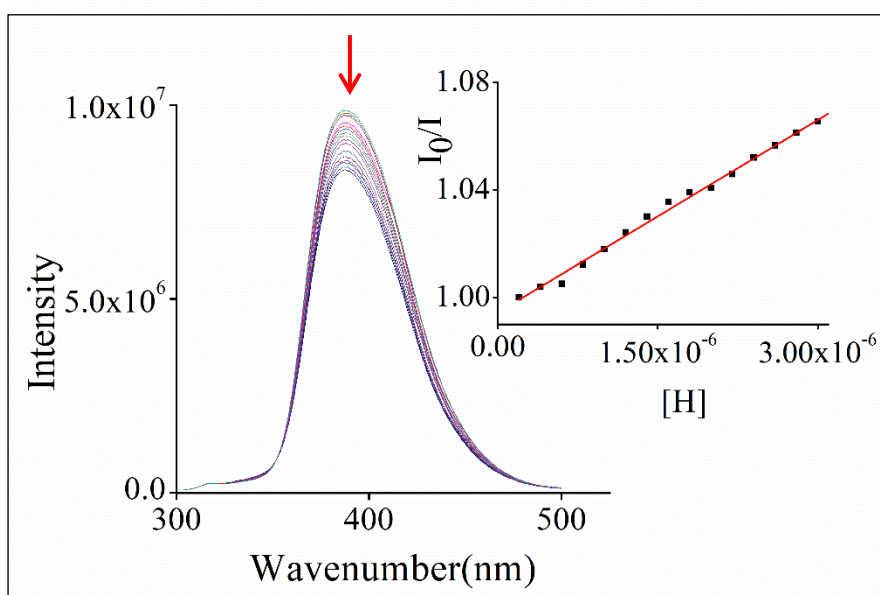

**Fig. S12** Emission intensity of *p*-phenylenediamine ( $1.3 \times 10^{-4}$  M) decreasing with incremental addition of host **2** ( $2.0$ – $24.0 \times 10^{-7}$  M) in tetrahydrofuran and inset shows the corresponding Stern-Volmer plot. Regression analysis was carried out at  $\lambda_{\max}$  387 nm.



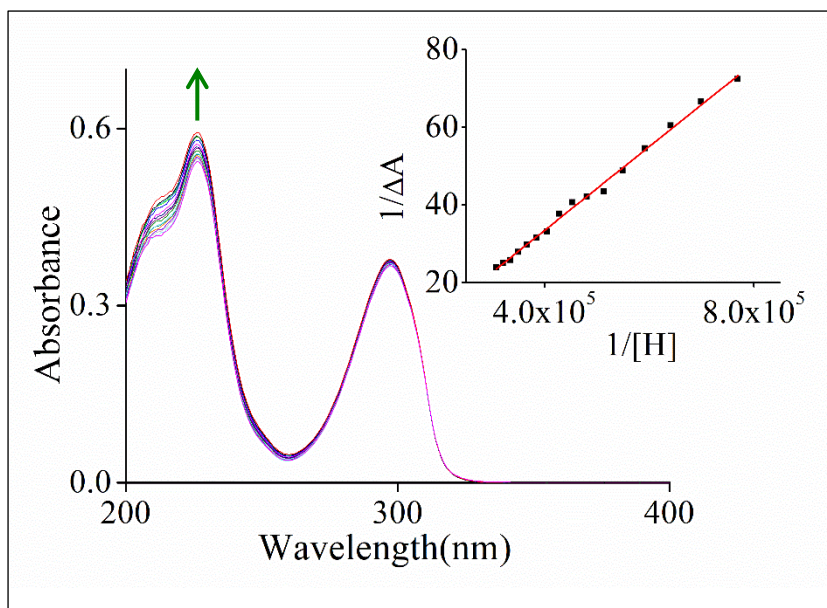

**Fig. S13** Electronic absorption spectra of quinol ( $1.3 \times 10^{-4}$  M) increasing upon incremental addition of host **2** ( $2.0\text{--}24.0 \times 10^{-7}$  M) in tetrahydrofuran and inset shows the corresponding Benesi-Hildebrand plot. Regression analysis was carried out at  $\lambda_{\text{max}}$  225 nm.

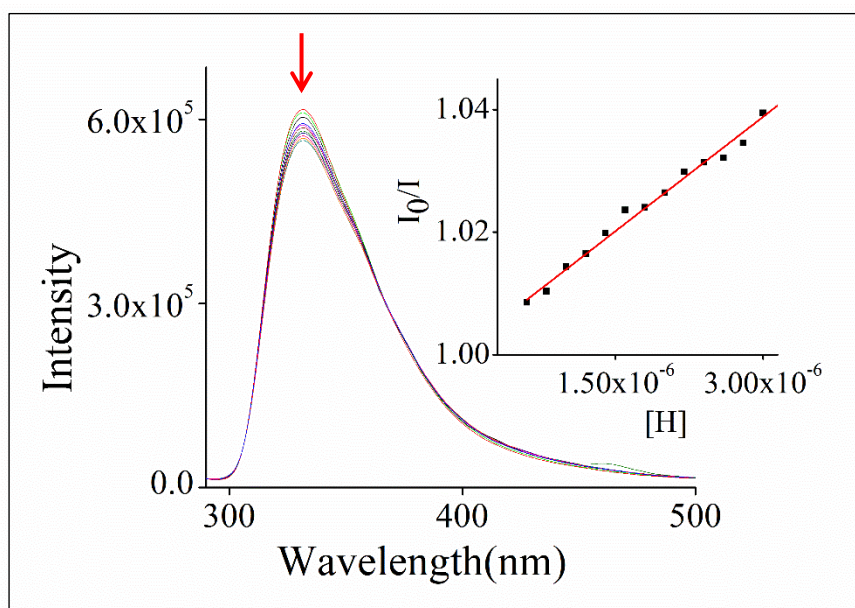

**Fig. S14** Emission intensity of quinol ( $1.3 \times 10^{-4}$  M) decreasing with incremental addition of host **2** ( $2.0\text{--}24.0 \times 10^{-7}$  M) in tetrahydrofuran and inset shows the corresponding Stern-Volmer plot. Regression analysis was carried out at  $\lambda_{\text{max}}$  330 nm.

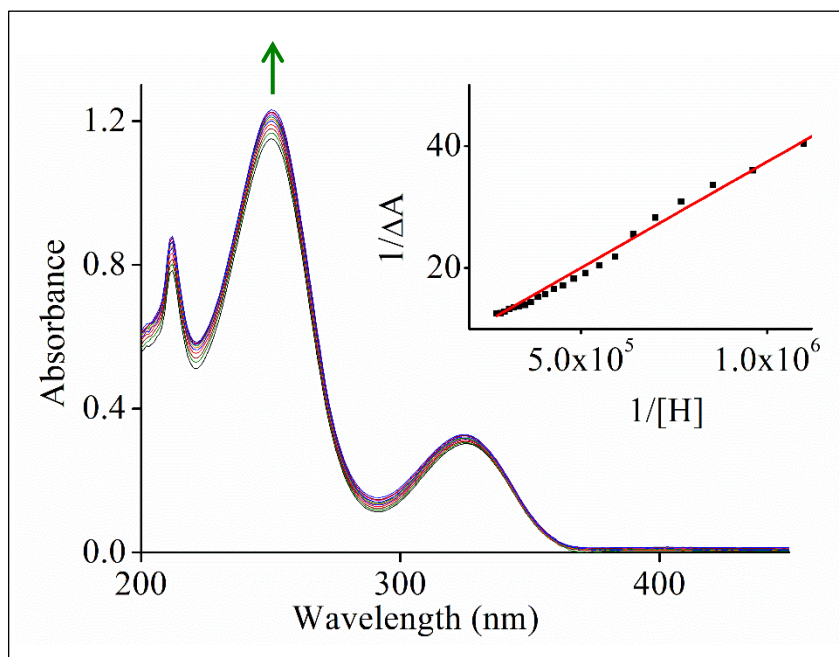

**Fig. S15** Electronic absorption spectra of *p*-phenylenediamine ( $1.3 \times 10^{-4}$  M) increasing upon incremental addition of host **3** ( $2.0\text{--}24.0 \times 10^{-7}$  M) in tetrahydrofuran and inset shows the corresponding Benesi-Hildebrand plot. Regression analysis was carried out at  $\lambda_{\text{max}}$  252 nm.

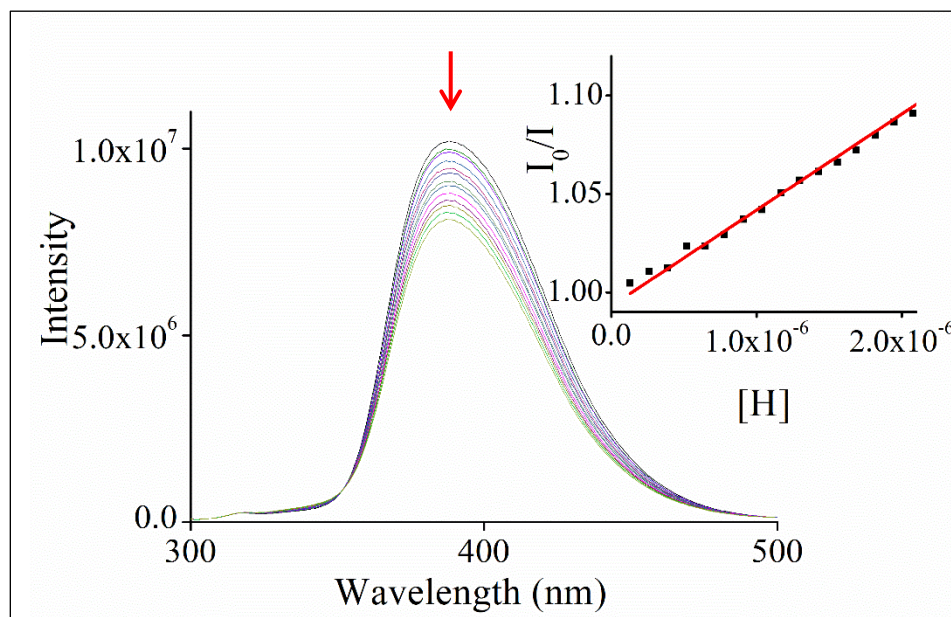

**Fig. S16** Emission intensity of *p*-phenylenediamine ( $1.3 \times 10^{-4}$  M) decreasing with incremental addition of host **3** ( $2.0\text{--}24.0 \times 10^{-7}$  M) in tetrahydrofuran and inset shows the corresponding Stern-Volmer plot. Regression analysis was carried out at  $\lambda_{\text{max}}$  380 nm

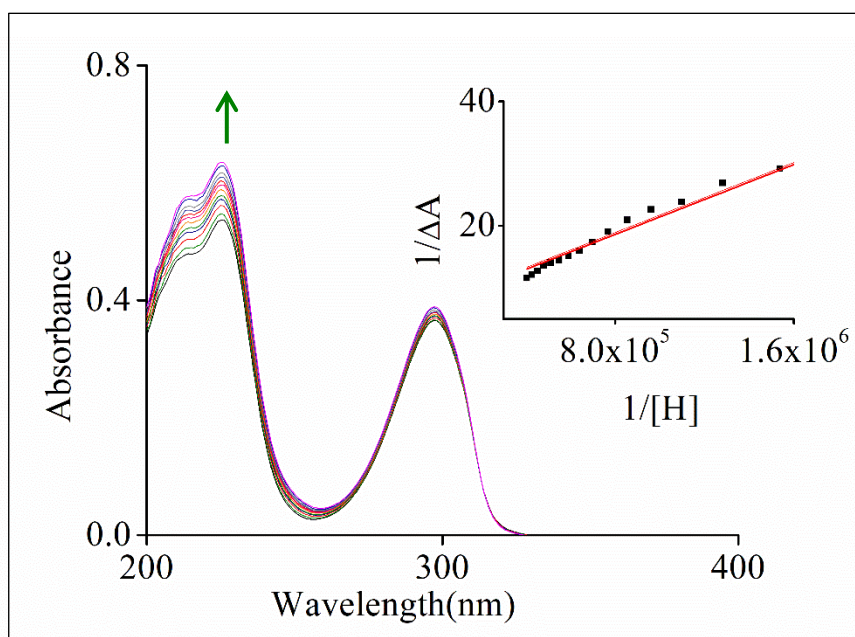

**Fig. S17** Electronic absorption spectra of quinol ( $1.3 \times 10^{-4}$  M) increasing upon incremental addition of host **3** ( $2.0\text{--}24.0 \times 10^{-7}$  M) in tetrahydrofuran and inset shows the corresponding Benesi-Hildebrand plot. Regression analysis was carried out at  $\lambda_{\text{max}}$  226 nm.

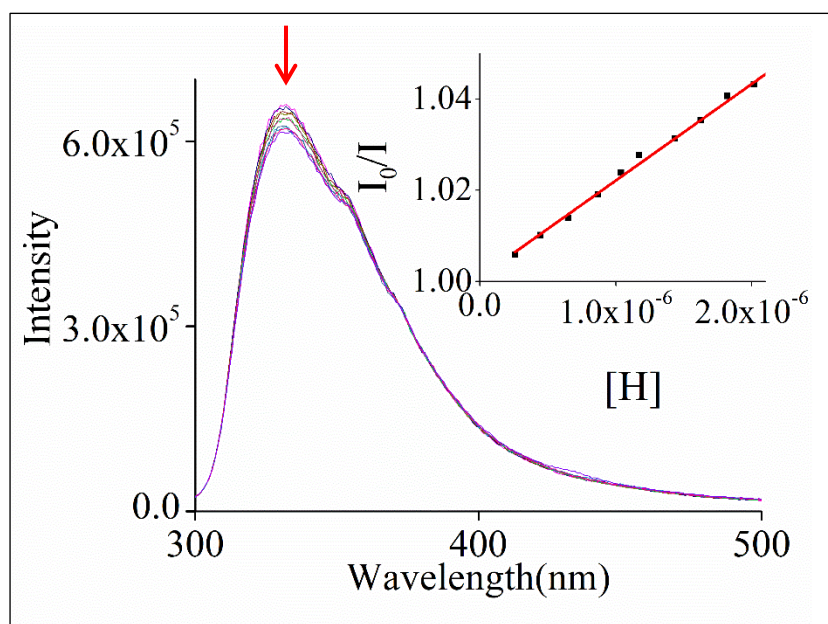

**Fig. S18** Emission intensity of quinol ( $1.3 \times 10^{-4}$  M) decreasing with incremental addition of host **3** ( $2.0\text{--}24.0 \times 10^{-7}$  M) in tetrahydrofuran and inset shows the corresponding Stern-Volmer plot. Regression analysis was carried out at  $\lambda_{\text{max}}$  331 nm.
